# Supplementary material for: RNA-seq reveals distinctive RNA profiles of small extracellular vesicles from different human liver cancer cell lines
Source: PubMed Central journal article supplement (PMC5669939; doi:10.18632/oncotarget.20503), 2017-08-24
Supplement: oncotarget-08-82920-s001.pdf [file oncotarget-08-82920-s001.pdf]

# RNA-seq reveals distinctive RNA profiles of small extracellular vesicles from different human liver cancer cell lines

## SUPPLEMENTARY MATERIALS

### Whole Transcriptome Analysis

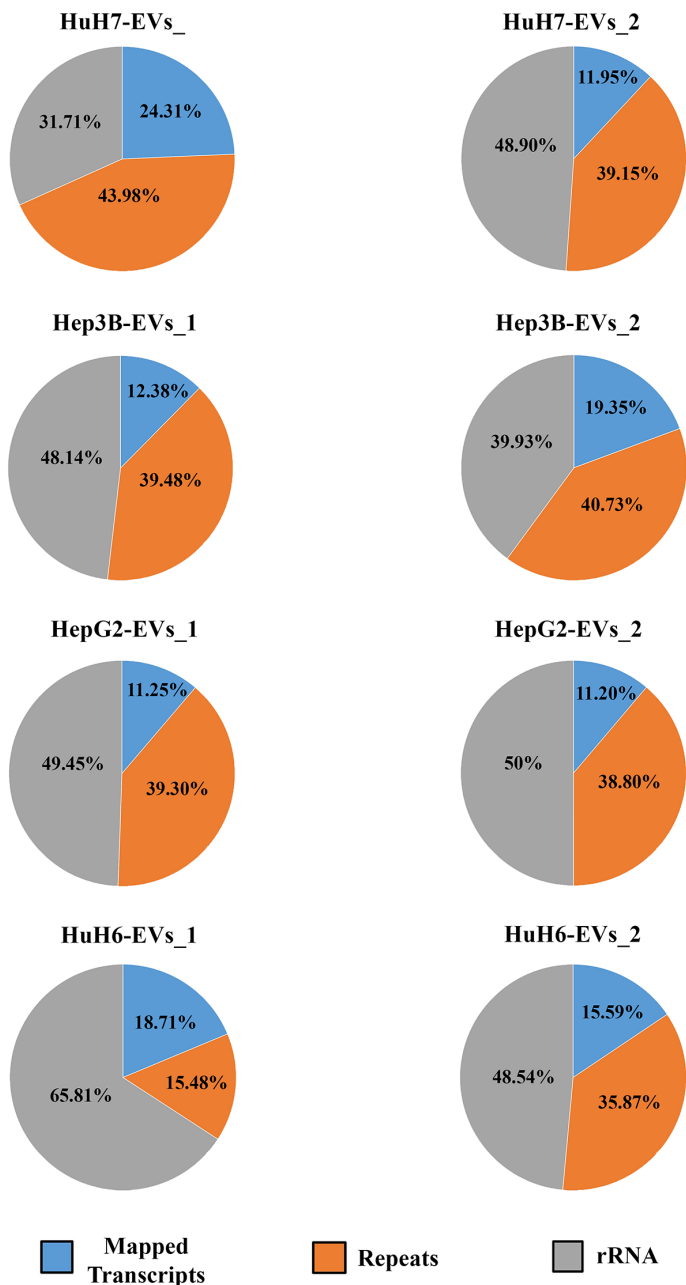

**Supplementary Figure 1: WTA library mapping statistics on the reference genome (hg38).** The WTA libraries, two duplicates for each LCC analyzed, have been used to identify coding and non-coding RNAs and snoRNAs.

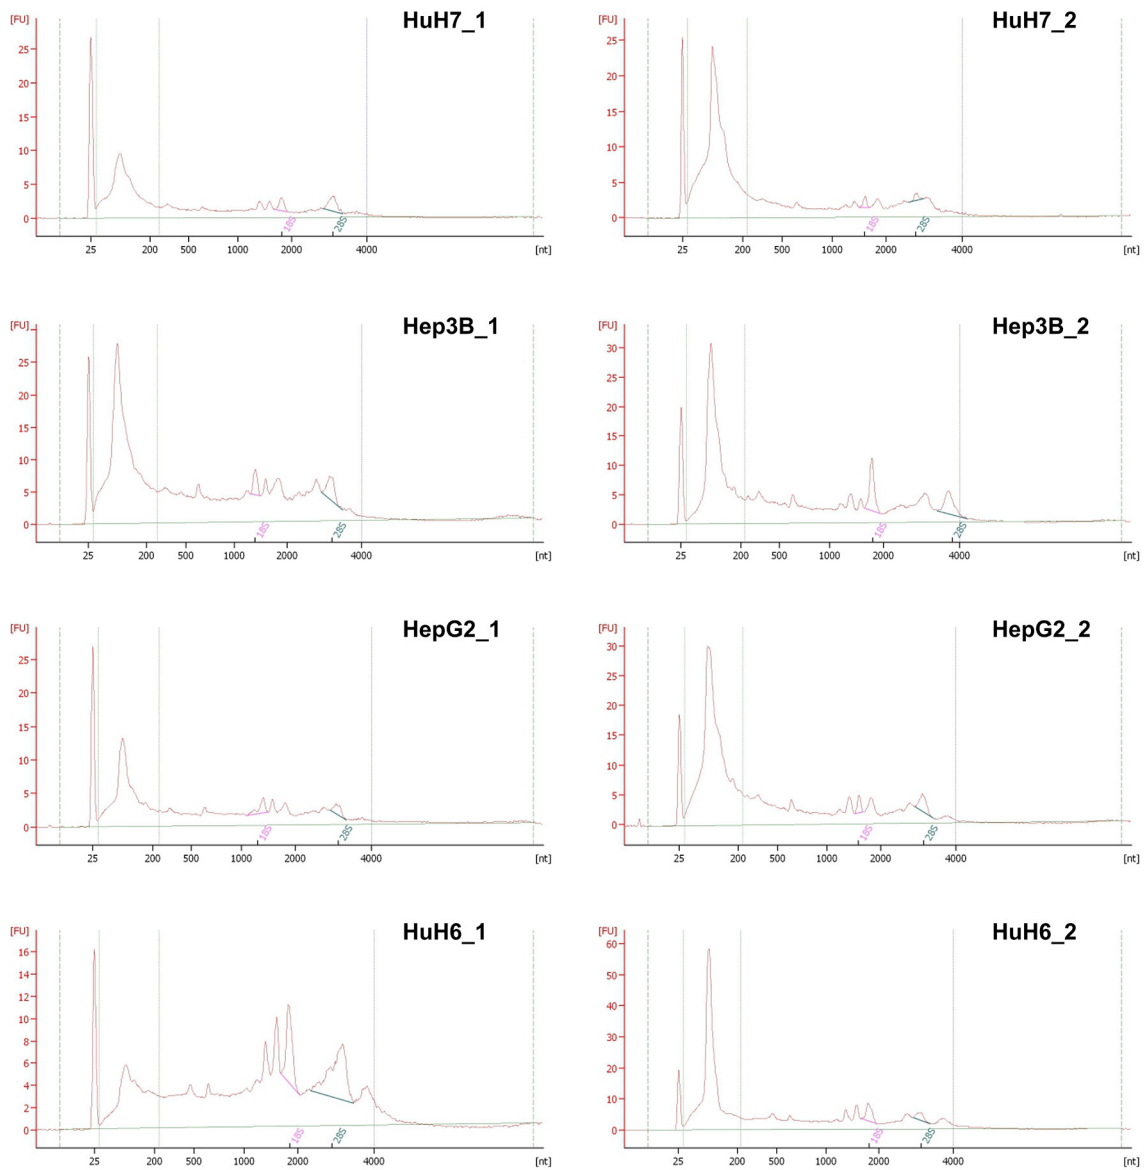

**Supplementary Figure 2: Size distribution of total RNA molecules contained in extracellular vesicles secreted from the 4 LCC. Two duplicates for each LCC are shown.**

Small RNA

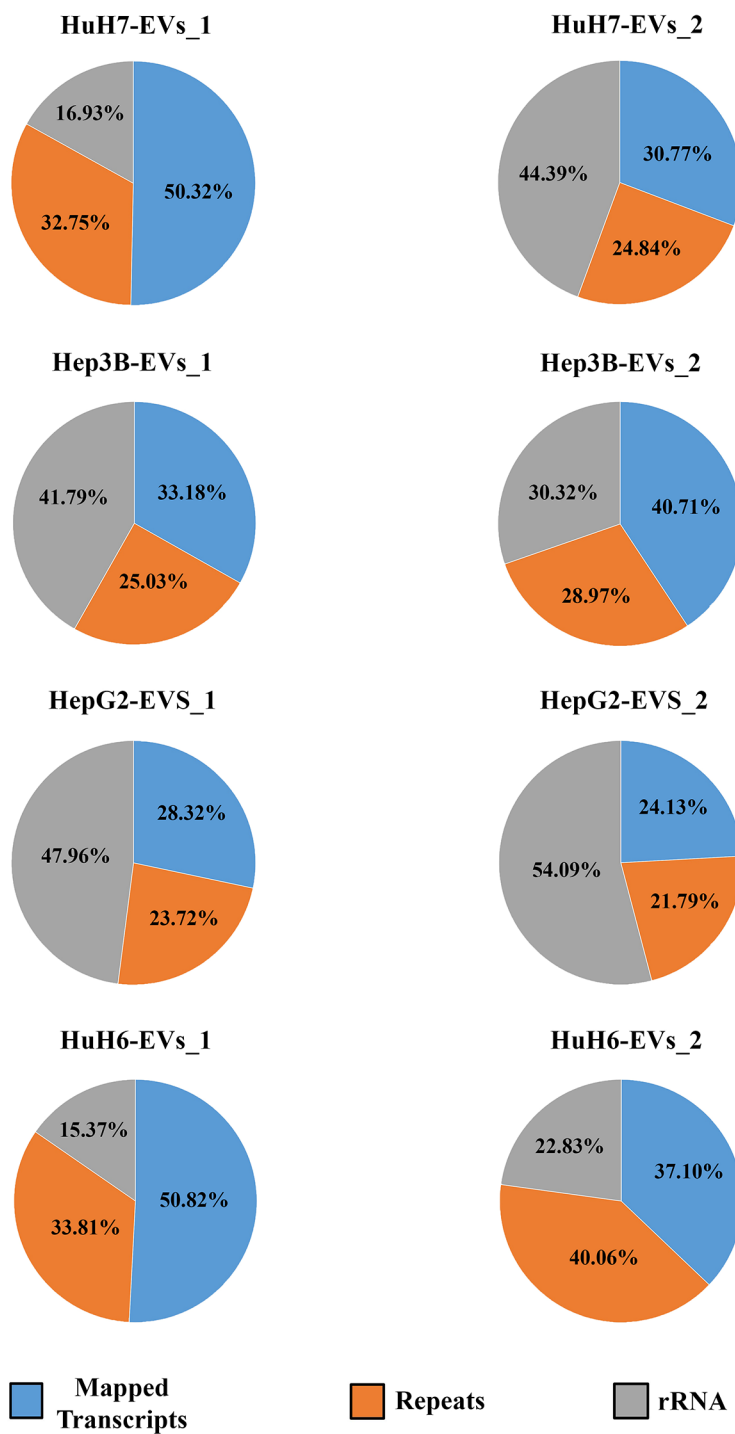

**Supplementary Figure 3: Small RNA library mapping statistics on the reference genome (hg38).** Small RNA libraries, two duplicates for each LCC analyzed, have been used to identify microRNAs and snoRNAs.

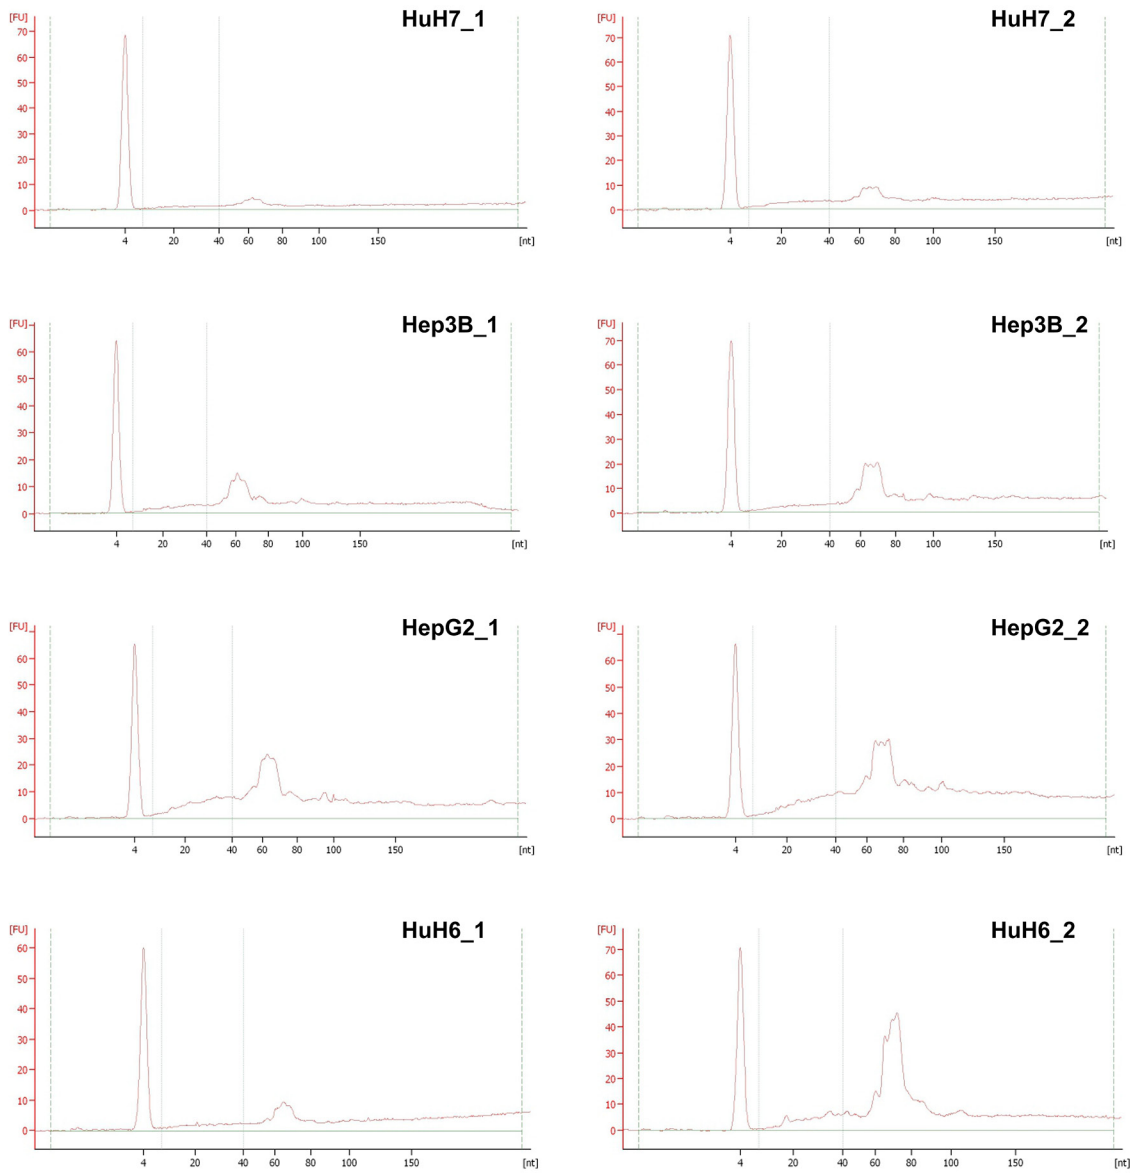

**Supplementary Figure 4: Size distribution of small RNA molecules contained in extracellular vesicles secreted from the 4 LCC. Two duplicates for each LCC are shown, as indicated.**

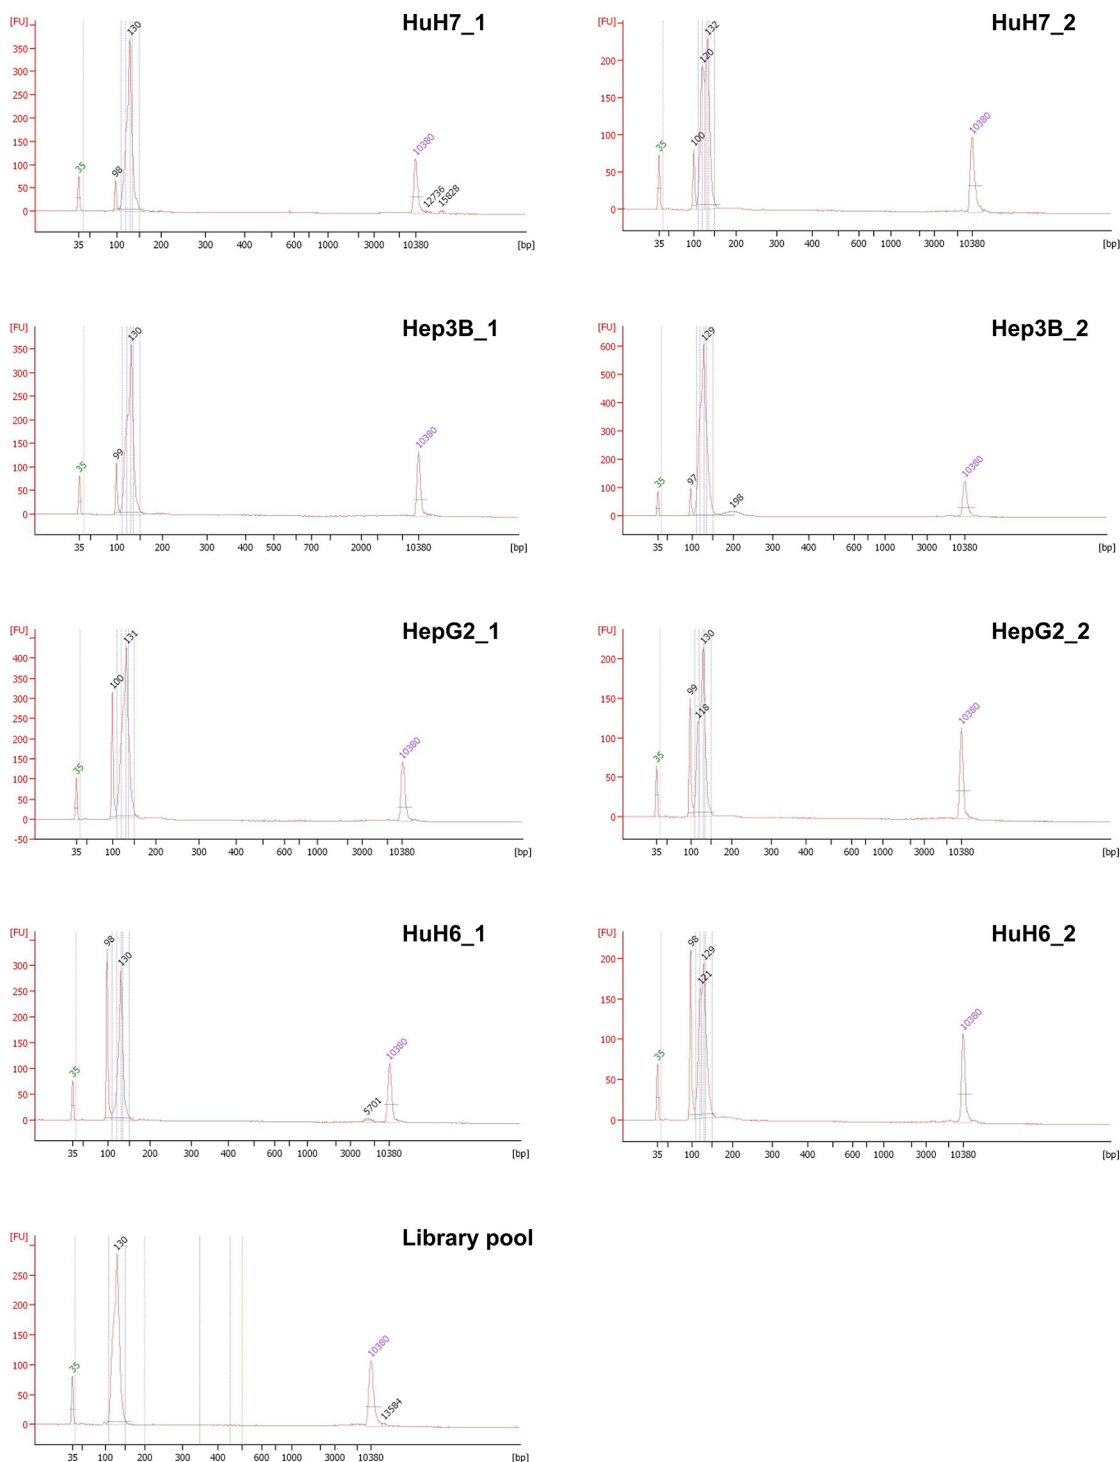

**Supplementary Figure 5: Size distribution of the small RNA libraries prepared from the total RNA contained in extracellular vesicles secreted from the 4 LCC.** Two duplicates for each LCC are shown, as indicated. 99-100 bp peak: “devil band”, formed by the excess adapter dimers; 118-130 bp peaks: bands containing the library inserts plus the adapters. Library pool: the 8 small RNA barcoded libraries were pooled and purified by gel electrophoresis to eliminate the devil band. The peaks at 35 bp and 10380 bp are size markers.

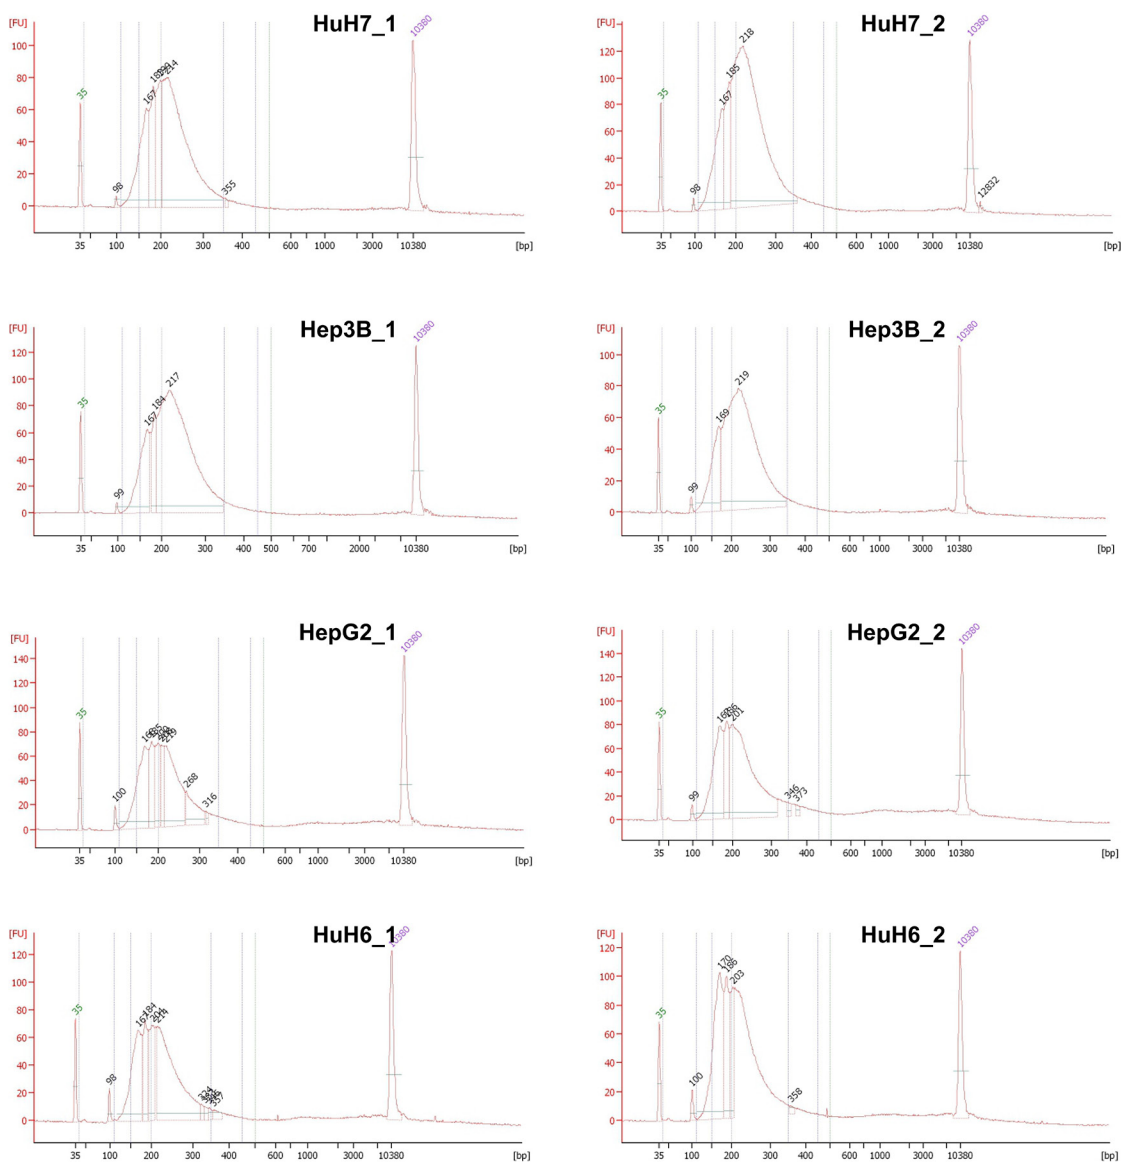

**Supplementary Figure 6: Size distribution of the WTA libraries prepared from the total RNA contained in extracellular vesicles secreted from the 4 LCC.** Two duplicates for each LCC are shown, as indicated. 99-100 bp peak: “devil band”, formed by the excess adapter dimers; 150-300 bp range: region containing the library inserts plus the adapters. The peaks at 35 bp and 10380 bp are size markers.

**Supplementary Table 1: Gene transcripts**

See Supplementary File 1

**Supplementary Table 2: miRNAs CPM**

See Supplementary File 2

**Supplementary Table 3A: isomiR CPM**

See Supplementary File 3A

**Supplementary Table 3B: 10 most expressed isomiRs**

See Supplementary File 3B

**Supplementary Table 4: miRNA-isomiR fraction**

| Small RNA library | isomiR reads | Canonical miRNA reads | Total reads | miRNA fraction | isomiR fraction |
|-------------------|--------------|-----------------------|-------------|----------------|-----------------|
| HuH7-EVs_1        | 349646       | 151404                | 501050      | 0,70           | 0,30            |
| HuH7-EVs_2        | 73628        | 25826                 | 99454       | 0,74           | 0,26            |
| Hep3B-EVs_1       | 252180       | 110761                | 362941      | 0,69           | 0,31            |
| Hep3B-EVs_2       | 644988       | 229879                | 874867      | 0,74           | 0,26            |
| HepG2-EVs_1       | 273205       | 101597                | 374802      | 0,73           | 0,27            |
| HepG2-EVs_2       | 428603       | 144845                | 573448      | 0,75           | 0,25            |
| HuH6-EVs_1        | 796749       | 313573                | 1110322     | 0,72           | 0,28            |
| HuH6-EVs_2        | 1761404      | 697756                | 2459160     | 0,72           | 0,28            |

**Supplementary Table 5: snoRNAs**

See Supplementary File 4

**Supplementary Table 6: snoRNA**

See Supplementary File 5
